# Supplementary figures and images for: Host-derived Lactobacillus plantarum alleviates hyperuricemia by improving gut microbial community and hydrolase-mediated degradation of purine nucleosides
Source: eLife journal article supplement (doi:10.7554/elife.100068), 2024-10-09

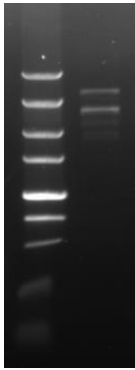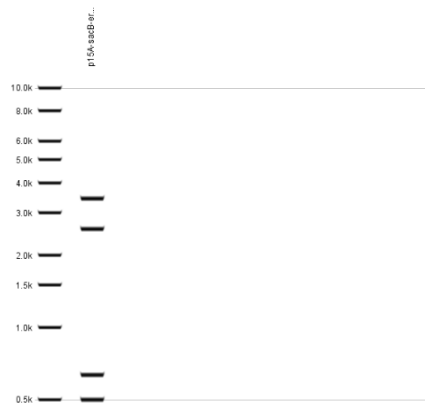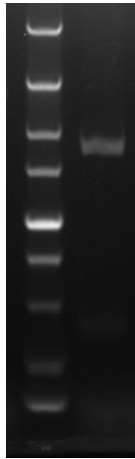

Supplement: fig5-figsupp1-data2 [file elife-100068-fig5-figsupp1-data2-v1.zip]

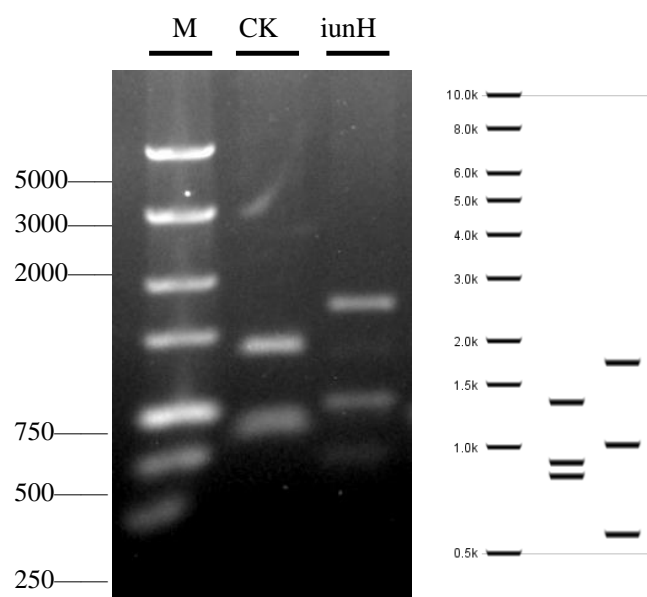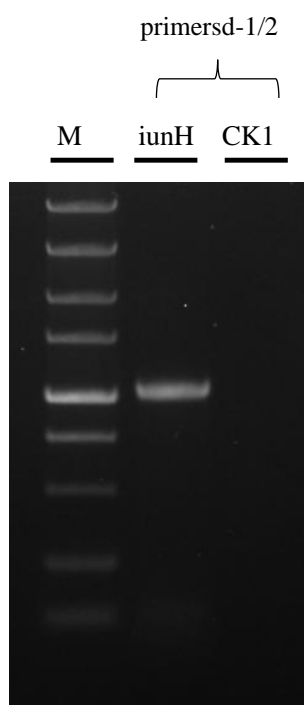

Supplement: fig5-figsupp1-data2 [file elife-100068-fig5-figsupp1-data2-v1.zip]
